# Supplementary material
Source: publisher figshare collection journal article supplement (https://acs.figshare.com/ndownloader/files/5338156)
Supplement: Supplementary file 1 [file 5338156]

data_publication_text
_publ_requested_journal          'Journal of the American Chemical Society'
_publ_contact_author_name        'Carlos Mart\'i-Gastaldo'
_publ_contact_author_address     
;Instituto de Ciencia Molecular 
Universidad de Valencia
Pol\'igono de la Coma s/n
46980, Paterna
Valencia
(Spain)  
;
_publ_contact_author_email       carlos.marti@uv.es
_publ_contact_author_phone       '+34 963544417'
loop_
_publ_author_name
_publ_author_address
'Carlos Mart\'i-Gastaldo'
;Instituto de Ciencia Molecular 
Universidad de Valencia
Pol\'igono de la Coma s/n
46980, Paterna
Valencia
(Spain)  
;
'Coronado, Eugenio'
;Instituto de Ciencia Molecular 
Universidad de Valencia
Pol\'igono de la Coma s/n
46980, Paterna
Valencia
(Spain)  
;
'Clemente-Juan, Modesto'
;Instituto de Ciencia Molecular 
Universidad de Valencia
Pol\'igono de la Coma s/n
46980, Paterna
Valencia
(Spain)  
;
'Aldamen, Murad A.'
;Instituto de Ciencia Molecular 
Universidad de Valencia
Pol\'igono de la Coma s/n
46980, Paterna
Valencia
(Spain)  
;
'Gaita-Arino, Alejandro'
;Instituto de Ciencia Molecular 
Universidad de Valencia
Pol\'igono de la Coma s/n
46980, Paterna
Valencia
(Spain)  
;

  
data_shelxl 
  
_audit_creation_method            SHELXL-97 
_chemical_name_systematic 
; 
 ? 
; 
_chemical_name_common             ? 
_chemical_melting_point           ? 
_chemical_formula_moiety          ? 
_chemical_formula_sum 
 'H0 Er Na9 O71 W10' 
_chemical_formula_weight          3348.67 
  
loop_ 
 _atom_type_symbol 
 _atom_type_description 
 _atom_type_scat_dispersion_real 
 _atom_type_scat_dispersion_imag 
 _atom_type_scat_source 
 'Na'  'Na'   0.0362   0.0249 
 'International Tables Vol C Tables 4.2.6.8 and 6.1.1.4' 
 'H'  'H'   0.0000   0.0000 
 'International Tables Vol C Tables 4.2.6.8 and 6.1.1.4' 
 'O'  'O'   0.0106   0.0060 
 'International Tables Vol C Tables 4.2.6.8 and 6.1.1.4' 
 'Er'  'Er'  -0.2586   4.9576 
 'International Tables Vol C Tables 4.2.6.8 and 6.1.1.4' 
 'W'  'W'  -0.8490   6.8722 
 'International Tables Vol C Tables 4.2.6.8 and 6.1.1.4' 
  
_symmetry_cell_setting            Triclinic 
_symmetry_space_group_name_H-M    P-1 
  
loop_ 
 _symmetry_equiv_pos_as_xyz 
 'x, y, z' 
 '-x, -y, -z' 
  
_cell_length_a                    12.744(3) 
_cell_length_b                    13.071(3) 
_cell_length_c                    20.470(4) 
_cell_angle_alpha                 82.89(3) 
_cell_angle_beta                  74.53(3) 
_cell_angle_gamma                 88.80(3) 
_cell_volume                      3260.8(11) 
_cell_formula_units_Z             2 
_cell_measurement_temperature     293(2) 
_cell_measurement_reflns_used     ? 
_cell_measurement_theta_min       ? 
_cell_measurement_theta_max       ? 
  
_exptl_crystal_description        ? 
_exptl_crystal_colour             ? 
_exptl_crystal_size_max           ? 
_exptl_crystal_size_mid           ? 
_exptl_crystal_size_min           ? 
_exptl_crystal_density_meas       ? 
_exptl_crystal_density_diffrn     3.411 
_exptl_crystal_density_method     'not measured' 
_exptl_crystal_F_000              2950 
_exptl_absorpt_coefficient_mu     19.017 
_exptl_absorpt_correction_type    none 
_exptl_absorpt_correction_T_min   ? 
_exptl_absorpt_correction_T_max   ? 
_exptl_absorpt_process_details    ? 
  
_exptl_special_details 
; 
 ? 
; 
  
_diffrn_ambient_temperature       293(2) 
_diffrn_radiation_wavelength      0.71073 
_diffrn_radiation_type            MoK\a 
_diffrn_radiation_source          'fine-focus sealed tube' 
_diffrn_radiation_monochromator   graphite 
_diffrn_measurement_device_type   'Bruker P4' 
_diffrn_measurement_method        '\w scans' 
_diffrn_detector_area_resol_mean  ? 
_diffrn_standards_number          ? 
_diffrn_standards_interval_count  ? 
_diffrn_standards_interval_time   ? 
_diffrn_standards_decay_%         ? 
_diffrn_reflns_number             33760 
_diffrn_reflns_av_R_equivalents   0.0777 
_diffrn_reflns_av_sigmaI/netI     0.1176 
_diffrn_reflns_limit_h_min        -17 
_diffrn_reflns_limit_h_max        17 
_diffrn_reflns_limit_k_min        -18 
_diffrn_reflns_limit_k_max        18 
_diffrn_reflns_limit_l_min        -28 
_diffrn_reflns_limit_l_max        28 
_diffrn_reflns_theta_min          2.18 
_diffrn_reflns_theta_max          30.09 
_reflns_number_total              18853 
_reflns_number_gt                 12199 
_reflns_threshold_expression      >2sigma(I) 
  
_computing_data_collection        'Bruker XSCANS' 
_computing_cell_refinement        'Bruker XSCANS' 
_computing_data_reduction         'Bruker SHELXTL' 
_computing_structure_solution     'SHELXS-97 (Sheldrick, 1990)' 
_computing_structure_refinement   'SHELXL-97 (Sheldrick, 1997)' 
_computing_molecular_graphics     'Bruker SHELXTL' 
_computing_publication_material   'Bruker SHELXTL' 
  
_refine_special_details 
; 
 Refinement of F^2^ against ALL reflections.  The weighted R-factor wR and 
 goodness of fit S are based on F^2^, conventional R-factors R are based 
 on F, with F set to zero for negative F^2^. The threshold expression of 
 F^2^ > 2sigma(F^2^) is used only for calculating R-factors(gt) etc. and is 
 not relevant to the choice of reflections for refinement.  R-factors based 
 on F^2^ are statistically about twice as large as those based on F, and R- 
 factors based on ALL data will be even larger. 
; 
  
_refine_ls_structure_factor_coef  Fsqd 
_refine_ls_matrix_type            full 
_refine_ls_weighting_scheme       calc 
_refine_ls_weighting_details 
 'calc w=1/[\s^2^(Fo^2^)+(0.1121P)^2^+0.0000P] where P=(Fo^2^+2Fc^2^)/3' 
_atom_sites_solution_primary      direct 
_atom_sites_solution_secondary    difmap 
_atom_sites_solution_hydrogens    geom 
_refine_ls_hydrogen_treatment     mixed 
_refine_ls_extinction_method      none 
_refine_ls_extinction_coef        ? 
_refine_ls_number_reflns          18853 
_refine_ls_number_parameters      820 
_refine_ls_number_restraints      0 
_refine_ls_R_factor_all           0.1103 
_refine_ls_R_factor_gt            0.0714 
_refine_ls_wR_factor_ref          0.1905 
_refine_ls_wR_factor_gt           0.1742 
_refine_ls_goodness_of_fit_ref    0.984 
_refine_ls_restrained_S_all       0.984 
_refine_ls_shift/su_max           0.001 
_refine_ls_shift/su_mean          0.000 
  
loop_ 
 _atom_site_label 
 _atom_site_type_symbol 
 _atom_site_fract_x 
 _atom_site_fract_y 
 _atom_site_fract_z 
 _atom_site_U_iso_or_equiv 
 _atom_site_adp_type 
 _atom_site_occupancy 
 _atom_site_symmetry_multiplicity 
 _atom_site_calc_flag 
 _atom_site_refinement_flags 
 _atom_site_disorder_assembly 
 _atom_site_disorder_group 
W4 W 0.67768(5) 0.93216(5) 0.24937(3) 0.01159(14) Uani 1 1 d . . . 
W9 W 0.37751(5) 1.27235(5) 0.38075(3) 0.01127(14) Uani 1 1 d . . . 
W3 W 0.76332(5) 1.06089(5) 0.09678(3) 0.01133(13) Uani 1 1 d . . . 
W8 W 0.33365(5) 1.27695(5) 0.23019(3) 0.01125(14) Uani 1 1 d . . . 
W5 W 0.83691(5) 1.07014(5) 0.30691(3) 0.01138(14) Uani 1 1 d . . . 
W2 W 0.92394(5) 1.19823(5) 0.15612(3) 0.01126(14) Uani 1 1 d . . . 
W7 W 0.50712(5) 1.46838(5) 0.17035(3) 0.01147(14) Uani 1 1 d . . . 
W6 W 0.55053(5) 1.46482(5) 0.31971(3) 0.01115(14) Uani 1 1 d . . . 
W10 W 0.29779(5) 1.49087(5) 0.30624(3) 0.01181(14) Uani 1 1 d . . . 
W1 W 0.94289(5) 0.94324(5) 0.17222(3) 0.01220(14) Uani 1 1 d . . . 
Er11 Er 0.62361(5) 1.21835(5) 0.23686(4) 0.01123(15) Uani 1 1 d . . . 
O69 O 0.4707(8) 1.3754(7) 0.3994(6) 0.012(2) Uani 1 1 d . . . 
O35 O 0.9412(8) 1.1706(8) 0.2470(5) 0.009(2) Uani 1 1 d . . . 
O67 O 0.5767(8) 1.5343(8) 0.2282(5) 0.011(2) Uani 1 1 d . . . 
O89 O 0.2931(8) 1.2189(8) 0.3263(5) 0.010(2) Uani 1 1 d . . . 
O9E O 0.4926(9) 1.1975(8) 0.3449(6) 0.015(2) Uani 1 1 d . . . 
O3E O 0.6650(9) 1.1522(8) 0.1320(6) 0.016(2) Uani 1 1 d . . . 
O5E O 0.7263(8) 1.1599(8) 0.3145(6) 0.011(2) Uani 1 1 d . . . 
O610 O 0.4082(8) 1.5438(7) 0.3382(6) 0.012(2) Uani 1 1 d . . . 
O6E O 0.6407(9) 1.3642(8) 0.2929(6) 0.015(2) Uani 1 1 d . . . 
O78 O 0.3971(8) 1.3791(8) 0.1535(6) 0.015(2) Uani 1 1 d . . . 
O23 O 0.8793(9) 1.1634(8) 0.0781(6) 0.018(3) Uani 1 1 d . . . 
O15 O 0.9472(8) 0.9680(8) 0.2640(6) 0.014(2) Uani 1 1 d . . . 
O8E O 0.4534(8) 1.1983(8) 0.2135(6) 0.013(2) Uani 1 1 d . . . 
O9 O 0.3217(9) 1.2038(8) 0.4605(7) 0.019(3) Uani 1 1 d . . . 
O2E O 0.8035(8) 1.2738(8) 0.1833(6) 0.011(2) Uani 1 1 d . . . 
O4E O 0.5869(9) 1.0389(8) 0.2646(6) 0.016(2) Uani 1 1 d . . . 
O7 O 0.5449(9) 1.5464(8) 0.0953(6) 0.017(2) Uani 1 1 d . . . 
O10 O 0.1889(8) 1.5779(8) 0.3289(7) 0.021(3) Uani 1 1 d . . . 
O910 O 0.2705(8) 1.3885(8) 0.3876(6) 0.014(2) Uani 1 1 d . . . 
O45 O 0.7361(8) 0.9519(7) 0.3274(6) 0.012(2) Uani 1 1 d . . . 
O1 O 1.0441(8) 0.8516(7) 0.1547(6) 0.013(2) Uani 1 1 d . . . 
O1C O 0.4306(8) 1.3773(7) 0.2783(5) 0.007(2) Uani 1 1 d . . . 
O14 O 0.8176(8) 0.8583(9) 0.2201(7) 0.020(3) Uani 1 1 d . . . 
O810 O 0.2355(9) 1.3926(8) 0.2635(6) 0.014(2) Uani 1 1 d . . . 
O7E O 0.6046(8) 1.3665(8) 0.1603(6) 0.013(2) Uani 1 1 d . . . 
O2 O 1.0273(9) 1.2877(9) 0.1161(7) 0.024(3) Uani 1 1 d . . . 
O13 O 0.8874(8) 0.9601(8) 0.0939(6) 0.011(2) Uani 1 1 d . . . 
O34 O 0.6756(8) 0.9463(8) 0.1536(6) 0.013(2) Uani 1 1 d . . . 
O710 O 0.3733(8) 1.5467(8) 0.2158(6) 0.012(2) Uani 1 1 d . . . 
O12 O 1.0178(9) 1.0712(8) 0.1404(6) 0.016(2) Uani 1 1 d . . . 
O6 O 0.6206(8) 1.5396(8) 0.3601(6) 0.012(2) Uani 1 1 d . . . 
Na1 Na 0.9404(5) 1.5482(5) 0.2072(4) 0.0179(14) Uani 1 1 d . . . 
Na2 Na 0.6342(5) 1.0097(5) -0.0582(3) 0.0169(14) Uani 1 1 d . . . 
Na3 Na 1.2041(5) 1.2819(5) 0.0103(4) 0.0219(15) Uani 1 1 d . . . 
Na4 Na 0.9687(5) 1.2055(5) 0.4371(4) 0.0197(14) Uani 1 1 d . . . 
Na5 Na 1.1806(5) 1.5474(5) 0.0614(4) 0.0239(16) Uani 1 1 d . . . 
Na6 Na 0.5649(5) 1.1026(5) 0.5090(4) 0.0195(14) Uani 1 1 d . . . 
Na7 Na 0.7477(5) 1.1360(5) 0.5884(4) 0.0192(14) Uani 1 1 d . . . 
Na8 Na 0.8001(6) 1.5685(5) 0.3796(4) 0.0240(16) Uani 1 1 d . . . 
Na9 Na 0.6862(5) 1.1025(5) -0.2326(4) 0.0204(15) Uani 1 1 d . . . 
O3 O 0.7406(9) 1.0501(9) 0.0198(8) 0.026(3) Uani 1 1 d . . . 
O5 O 0.8706(9) 1.0702(9) 0.3839(6) 0.017(2) Uani 1 1 d . . . 
O4 O 0.5944(9) 0.8234(8) 0.2852(6) 0.016(2) Uani 1 1 d . . . 
O2C O 0.8103(8) 1.0585(7) 0.2008(6) 0.012(2) Uani 1 1 d . . . 
O3W O 0.5171(9) 1.3874(9) 0.5276(6) 0.021(3) Uani 1 1 d . . . 
O2W O 0.4546(9) 0.7350(9) -0.0459(7) 0.021(3) Uani 1 1 d . . . 
O32N O 0.7655(10) 1.7453(9) 0.4054(6) 0.024(3) Uani 1 1 d . . . 
O8 O 0.2443(9) 1.2146(8) 0.1963(7) 0.020(3) Uani 1 1 d . . . 
O31N O 1.1127(9) 1.0972(9) 0.3874(7) 0.025(3) Uani 1 1 d . . . 
O30N O 0.9687(9) 1.5504(10) 0.4128(7) 0.029(3) Uani 1 1 d . . . 
O29N O 1.3159(12) 1.6535(10) 0.0915(8) 0.034(3) Uani 1 1 d . . . 
O1W O 0.9811(10) 0.8190(10) 0.3575(7) 0.031(3) Uani 1 1 d . . . 
O28N O 1.1043(9) 1.4489(9) 0.1707(7) 0.021(3) Uani 1 1 d . . . 
O27N O 0.5214(9) 0.8805(9) 0.0222(6) 0.020(3) Uani 1 1 d . . . 
O26N O 0.4535(8) 0.9794(8) 0.5817(6) 0.013(2) Uani 1 1 d . . . 
O25N O 0.7638(9) 0.8734(9) -0.0810(6) 0.019(3) Uani 1 1 d . . . 
O24N O 1.0200(9) 1.2976(8) 0.3227(6) 0.017(2) Uani 1 1 d . . . 
O23N O 0.7971(9) 1.2089(8) 0.6737(7) 0.023(3) Uani 1 1 d . . . 
O22N O 0.5545(9) 0.9844(8) -0.1530(6) 0.017(2) Uani 1 1 d . . . 
O21N O 1.1075(9) 1.4411(9) -0.0110(6) 0.020(3) Uani 1 1 d . . . 
O20N O 0.7215(9) 1.4964(9) 0.4990(6) 0.020(3) Uani 1 1 d . . . 
O19N O 0.6458(9) 1.2407(8) 0.4287(5) 0.013(2) Uani 1 1 d . . . 
O18N O 1.0704(9) 1.2033(8) -0.0233(6) 0.019(2) Uani 1 1 d . . . 
O17N O 1.3143(10) 1.4084(9) 0.0390(6) 0.023(3) Uani 1 1 d . . . 
O16N O 1.2256(10) 1.6491(9) -0.0383(6) 0.021(3) Uani 1 1 d . . . 
O15N O 0.8148(9) 1.4876(9) 0.1544(7) 0.022(3) Uani 1 1 d . . . 
O14N O 0.8499(9) 1.4319(8) 0.3102(6) 0.017(2) Uani 1 1 d . . . 
O13N O 0.7984(9) 1.6565(9) 0.2616(7) 0.025(3) Uani 1 1 d . . . 
O12N O 0.7294(10) 1.0168(9) 0.5103(7) 0.025(3) Uani 1 1 d . . . 
O11N O 0.7321(8) 1.1483(8) -0.1349(6) 0.015(2) Uani 1 1 d . . . 
O10N O 0.5715(9) 1.2043(9) 0.5935(6) 0.022(3) Uani 1 1 d . . . 
O9N O 1.0550(9) 1.3551(9) 0.4636(6) 0.021(3) Uani 1 1 d . . . 
O8N O 0.8013(9) 1.2793(8) 0.4899(7) 0.021(3) Uani 1 1 d . . . 
O7N O 1.3363(9) 1.2377(10) -0.0917(7) 0.026(3) Uani 1 1 d . . . 
O6N O 0.6376(9) 1.0082(9) 0.6794(7) 0.023(3) Uani 1 1 d . . . 
O5N O 0.8418(10) 0.9826(9) -0.2594(7) 0.026(3) Uani 1 1 d . . . 
O4N O 0.5562(9) 1.2402(9) -0.2167(7) 0.022(3) Uani 1 1 d . . . 
O3N O 1.0285(10) 1.6586(9) 0.1025(6) 0.022(3) Uani 1 1 d . . . 
O2N O 0.9407(10) 1.0992(9) 0.5426(7) 0.028(3) Uani 1 1 d . . . 
O1N O 1.0479(11) 1.6534(10) 0.2482(7) 0.027(3) Uani 1 1 d . . . 
  
loop_ 
 _atom_site_aniso_label 
 _atom_site_aniso_U_11 
 _atom_site_aniso_U_22 
 _atom_site_aniso_U_33 
 _atom_site_aniso_U_23 
 _atom_site_aniso_U_13 
 _atom_site_aniso_U_12 
W4 0.0072(3) 0.0093(3) 0.0173(3) -0.0011(2) -0.0017(2) -0.0024(2) 
W9 0.0078(3) 0.0093(3) 0.0155(3) -0.0008(2) -0.0013(2) -0.0020(2) 
W3 0.0076(3) 0.0109(3) 0.0149(3) -0.0018(2) -0.0019(2) -0.0020(2) 
W8 0.0075(3) 0.0095(3) 0.0163(3) -0.0015(2) -0.0023(2) -0.0021(2) 
W5 0.0076(3) 0.0106(3) 0.0153(3) -0.0012(2) -0.0019(2) -0.0018(2) 
W2 0.0073(3) 0.0097(3) 0.0158(3) -0.0016(2) -0.0014(2) -0.0026(2) 
W7 0.0082(3) 0.0097(3) 0.0157(3) -0.0005(2) -0.0021(2) -0.0017(2) 
W6 0.0069(3) 0.0097(3) 0.0163(3) -0.0017(2) -0.0019(2) -0.0022(2) 
W10 0.0069(3) 0.0096(3) 0.0182(3) -0.0019(2) -0.0017(2) -0.0012(2) 
W1 0.0071(3) 0.0102(3) 0.0187(4) -0.0028(2) -0.0020(2) -0.0014(2) 
Er11 0.0077(3) 0.0097(3) 0.0155(4) -0.0012(3) -0.0018(3) -0.0016(2) 
O69 0.013(5) 0.002(5) 0.021(6) 0.002(4) -0.009(5) 0.001(4) 
O35 0.014(5) 0.008(5) 0.005(5) -0.003(4) 0.000(4) 0.011(4) 
O67 0.009(5) 0.013(5) 0.004(5) 0.001(4) 0.007(4) -0.001(4) 
O89 0.015(5) 0.009(5) 0.006(5) 0.000(4) 0.000(4) -0.004(4) 
O9E 0.015(5) 0.017(6) 0.010(6) 0.009(4) -0.003(5) 0.002(5) 
O3E 0.013(5) 0.003(5) 0.035(8) -0.001(5) -0.011(5) -0.003(4) 
O5E 0.007(5) 0.006(5) 0.018(6) 0.003(4) -0.005(4) -0.006(4) 
O610 0.006(5) 0.004(5) 0.027(7) -0.002(4) -0.007(5) 0.000(4) 
O6E 0.019(6) 0.009(5) 0.019(6) -0.002(4) -0.009(5) -0.005(4) 
O78 0.007(5) 0.012(5) 0.026(7) -0.013(5) 0.001(5) 0.000(4) 
O23 0.015(5) 0.012(5) 0.030(7) 0.000(5) -0.011(5) -0.006(4) 
O15 0.002(4) 0.016(6) 0.022(7) 0.000(5) 0.000(4) -0.001(4) 
O8E 0.003(4) 0.015(5) 0.023(7) -0.005(5) -0.007(4) -0.002(4) 
O9 0.014(5) 0.005(5) 0.039(8) -0.001(5) -0.008(5) 0.003(4) 
O2E 0.002(4) 0.008(5) 0.020(6) -0.006(4) 0.002(4) -0.001(4) 
O4E 0.017(6) 0.010(5) 0.020(7) 0.003(5) -0.006(5) -0.004(4) 
O7 0.014(5) 0.011(5) 0.021(7) -0.002(5) 0.001(5) 0.006(4) 
O10 0.005(5) 0.008(5) 0.043(8) -0.005(5) 0.004(5) 0.004(4) 
O910 0.007(5) 0.022(6) 0.017(6) -0.015(5) -0.003(4) 0.007(4) 
O45 0.012(5) 0.002(5) 0.021(6) 0.001(4) -0.006(5) -0.006(4) 
O1 0.006(5) 0.001(5) 0.032(7) -0.009(4) 0.002(5) 0.002(4) 
O1C 0.008(5) 0.008(5) 0.004(5) 0.006(4) -0.004(4) -0.001(4) 
O14 0.002(5) 0.013(6) 0.039(8) -0.005(5) 0.006(5) 0.003(4) 
O810 0.014(5) 0.018(6) 0.009(6) -0.006(4) 0.000(4) 0.004(5) 
O7E 0.010(5) 0.007(5) 0.023(7) -0.005(4) -0.005(5) -0.002(4) 
O2 0.018(6) 0.023(7) 0.026(7) 0.001(5) 0.002(5) -0.010(5) 
O13 0.006(5) 0.007(5) 0.015(6) 0.002(4) 0.003(4) 0.000(4) 
O34 0.012(5) 0.009(5) 0.020(6) 0.004(4) -0.011(5) 0.002(4) 
O710 0.008(5) 0.009(5) 0.016(6) 0.001(4) -0.001(4) -0.002(4) 
O12 0.015(5) 0.010(5) 0.019(7) 0.004(5) 0.000(5) 0.004(4) 
O6 0.008(5) 0.013(5) 0.014(6) -0.002(4) -0.001(4) 0.001(4) 
Na1 0.013(3) 0.018(3) 0.020(4) 0.002(3) -0.001(3) -0.005(3) 
Na2 0.013(3) 0.020(3) 0.017(4) -0.001(3) -0.003(3) -0.003(3) 
Na3 0.019(3) 0.015(3) 0.033(4) -0.004(3) -0.009(3) -0.002(3) 
Na4 0.018(3) 0.017(3) 0.020(4) -0.004(3) 0.003(3) 0.001(3) 
Na5 0.017(3) 0.021(4) 0.031(4) 0.009(3) -0.006(3) -0.003(3) 
Na6 0.019(3) 0.018(3) 0.019(4) 0.000(3) -0.001(3) -0.008(3) 
Na7 0.014(3) 0.022(3) 0.021(4) -0.004(3) -0.004(3) -0.007(3) 
Na8 0.021(3) 0.022(4) 0.032(4) -0.007(3) -0.010(3) -0.002(3) 
Na9 0.013(3) 0.017(3) 0.031(4) -0.007(3) -0.004(3) -0.002(3) 
O3 0.010(5) 0.013(6) 0.053(10) -0.006(6) 0.000(6) -0.003(5) 
O5 0.011(5) 0.020(6) 0.021(7) 0.000(5) -0.008(5) 0.001(5) 
O4 0.016(5) 0.004(5) 0.027(7) 0.012(4) -0.008(5) -0.009(4) 
O2C 0.003(4) 0.006(5) 0.032(7) -0.003(5) -0.012(5) -0.008(4) 
O3W 0.017(6) 0.018(6) 0.024(7) -0.005(5) 0.004(5) 0.004(5) 
O2W 0.013(5) 0.023(6) 0.029(7) -0.010(5) -0.006(5) 0.006(5) 
O32N 0.033(7) 0.028(7) 0.010(6) 0.003(5) -0.006(5) -0.001(6) 
O8 0.015(5) 0.013(5) 0.039(8) -0.004(5) -0.020(6) 0.003(5) 
O31N 0.015(6) 0.023(7) 0.036(8) 0.003(6) -0.006(6) -0.006(5) 
O30N 0.011(6) 0.035(8) 0.043(9) -0.006(6) -0.010(6) -0.005(5) 
O29N 0.045(9) 0.020(7) 0.049(10) -0.009(6) -0.034(8) 0.006(6) 
O1W 0.023(7) 0.027(7) 0.042(9) 0.010(6) -0.011(6) -0.001(6) 
O28N 0.017(6) 0.016(6) 0.031(8) -0.005(5) -0.007(5) -0.008(5) 
O27N 0.020(6) 0.019(6) 0.018(7) 0.001(5) 0.001(5) -0.009(5) 
O26N 0.010(5) 0.014(5) 0.015(6) 0.001(4) -0.003(4) -0.003(4) 
O25N 0.015(6) 0.016(6) 0.026(7) -0.004(5) -0.004(5) -0.002(5) 
O24N 0.016(5) 0.004(5) 0.034(7) -0.001(5) -0.014(5) -0.005(4) 
O23N 0.017(6) 0.010(5) 0.042(9) -0.007(5) -0.004(6) -0.005(5) 
O22N 0.014(5) 0.008(5) 0.029(7) 0.005(5) -0.008(5) -0.006(4) 
O21N 0.019(6) 0.024(6) 0.018(7) -0.005(5) -0.004(5) -0.011(5) 
O20N 0.015(6) 0.018(6) 0.023(7) -0.003(5) 0.001(5) -0.002(5) 
O19N 0.020(6) 0.013(5) 0.005(5) -0.003(4) 0.001(4) 0.000(4) 
O18N 0.020(6) 0.015(6) 0.021(7) 0.001(5) -0.008(5) -0.007(5) 
O17N 0.022(6) 0.023(6) 0.023(7) 0.000(5) -0.007(5) -0.001(5) 
O16N 0.025(6) 0.012(6) 0.026(7) 0.003(5) -0.012(6) 0.006(5) 
O15N 0.018(6) 0.020(6) 0.032(8) -0.007(5) -0.010(6) -0.005(5) 
O14N 0.011(5) 0.014(6) 0.024(7) 0.000(5) -0.001(5) -0.001(4) 
O13N 0.016(6) 0.016(6) 0.040(8) -0.018(6) 0.001(6) 0.013(5) 
O12N 0.022(6) 0.023(6) 0.027(8) -0.009(6) -0.002(6) -0.003(5) 
O11N 0.009(5) 0.020(6) 0.016(6) -0.005(5) 0.000(5) -0.001(4) 
O10N 0.013(5) 0.027(7) 0.026(7) -0.012(5) -0.001(5) -0.004(5) 
O9N 0.014(6) 0.022(6) 0.026(7) -0.011(5) 0.002(5) -0.005(5) 
O8N 0.017(6) 0.012(6) 0.034(8) -0.003(5) -0.005(5) -0.005(5) 
O7N 0.016(6) 0.030(7) 0.027(8) -0.012(6) 0.004(5) -0.009(5) 
O6N 0.016(6) 0.022(6) 0.032(8) -0.006(5) -0.008(5) -0.004(5) 
O5N 0.018(6) 0.018(6) 0.046(9) 0.003(6) -0.018(6) -0.002(5) 
O4N 0.017(6) 0.023(6) 0.026(7) 0.002(5) -0.007(5) -0.011(5) 
O3N 0.021(6) 0.023(6) 0.017(7) 0.004(5) 0.000(5) 0.000(5) 
O2N 0.022(6) 0.021(6) 0.034(8) 0.003(6) 0.003(6) 0.000(5) 
O1N 0.041(8) 0.028(7) 0.020(7) -0.003(6) -0.019(6) 0.011(6) 
  
_geom_special_details 
; 
 All esds (except the esd in the dihedral angle between two l.s. planes) 
 are estimated using the full covariance matrix.  The cell esds are taken 
 into account individually in the estimation of esds in distances, angles 
 and torsion angles; correlations between esds in cell parameters are only 
 used when they are defined by crystal symmetry.  An approximate (isotropic) 
 treatment of cell esds is used for estimating esds involving l.s. planes. 
; 
  
loop_ 
 _geom_bond_atom_site_label_1 
 _geom_bond_atom_site_label_2 
 _geom_bond_distance 
 _geom_bond_site_symmetry_2 
 _geom_bond_publ_flag 
W4 O4 1.753(10) . ? 
W4 O4E 1.798(11) . ? 
W4 O34 1.952(11) . ? 
W4 O45 1.980(11) . ? 
W4 O14 1.993(10) . ? 
W4 O2C 2.321(10) . ? 
W9 O9 1.737(12) . ? 
W9 O9E 1.786(11) . ? 
W9 O89 1.937(10) . ? 
W9 O69 1.951(10) . ? 
W9 O910 2.012(10) . ? 
W9 O1C 2.304(10) . ? 
W3 O3 1.700(15) . ? 
W3 O3E 1.783(11) . ? 
W3 O23 1.945(11) . ? 
W3 O34 1.948(11) . ? 
W3 O13 2.031(9) . ? 
W3 O2C 2.358(11) . ? 
W8 O8 1.744(11) . ? 
W8 O8E 1.802(10) . ? 
W8 O78 1.936(12) . ? 
W8 O89 1.954(10) . ? 
W8 O810 2.009(10) . ? 
W8 O1C 2.292(10) . ? 
W5 O5 1.740(12) . ? 
W5 O5E 1.802(10) . ? 
W5 O35 1.949(11) . ? 
W5 O45 1.962(10) . ? 
W5 O15 2.021(10) . ? 
W5 O2C 2.309(11) . ? 
W2 O2 1.739(12) . ? 
W2 O2E 1.805(9) . ? 
W2 O35 1.921(10) . ? 
W2 O23 1.938(12) . ? 
W2 O12 2.034(10) . ? 
W2 O2C 2.294(10) . ? 
W7 O7 1.695(12) . ? 
W7 O7E 1.795(10) . ? 
W7 O67 1.942(11) . ? 
W7 O78 1.968(10) . ? 
W7 O710 2.034(10) . ? 
W7 O1C 2.345(10) . ? 
W6 O6 1.750(11) . ? 
W6 O6E 1.770(11) . ? 
W6 O67 1.925(10) . ? 
W6 O69 1.938(11) . ? 
W6 O610 2.038(10) . ? 
W6 O1C 2.316(10) . ? 
W10 O10 1.777(10) . ? 
W10 O610 1.880(10) . ? 
W10 O710 1.905(11) . ? 
W10 O810 1.933(11) . ? 
W10 O910 1.960(12) . ? 
W10 O1C 2.233(10) . ? 
W1 O1 1.739(9) . ? 
W1 O12 1.897(11) . ? 
W1 O13 1.904(11) . ? 
W1 O14 1.926(11) . ? 
W1 O15 1.960(12) . ? 
W1 O2C 2.247(10) . ? 
Er11 O3E 2.339(12) . ? 
Er11 O2E 2.349(10) . ? 
Er11 O5E 2.364(10) . ? 
Er11 O8E 2.369(10) . ? 
Er11 O4E 2.370(11) . ? 
Er11 O9E 2.378(11) . ? 
Er11 O6E 2.385(10) . ? 
Er11 O7E 2.387(11) . ? 
O2 Na3 2.684(14) . ? 
O6 Na8 2.469(12) . ? 
Na1 O1N 2.334(15) . ? 
Na1 O15N 2.355(14) . ? 
Na1 O13N 2.393(12) . ? 
Na1 O28N 2.429(13) . ? 
Na1 O3N 2.440(14) . ? 
Na1 O14N 2.463(13) . ? 
Na1 Na8 3.544(10) . ? 
Na1 Na5 3.663(10) . ? 
Na2 O11N 2.378(13) . ? 
Na2 O27N 2.403(13) . ? 
Na2 O25N 2.407(13) . ? 
Na2 O27N 2.429(13) 2_675 ? 
Na2 O3 2.461(15) . ? 
Na2 O22N 2.476(13) . ? 
Na2 Na9 3.515(10) . ? 
Na2 Na2 3.602(13) 2_675 ? 
Na3 O18N 2.303(13) . ? 
Na3 O17N 2.414(14) . ? 
Na3 O7N 2.431(14) . ? 
Na3 O25N 2.436(14) 2_775 ? 
Na3 O21N 2.447(14) . ? 
Na3 Na5 3.730(10) . ? 
Na4 O2N 2.364(15) . ? 
Na4 O8N 2.364(13) . ? 
Na4 O31N 2.380(14) . ? 
Na4 O24N 2.426(14) . ? 
Na4 O9N 2.449(13) . ? 
Na4 O5 2.679(13) . ? 
Na4 Na7 3.620(10) . ? 
Na5 O16N 2.235(14) . ? 
Na5 O28N 2.407(15) . ? 
Na5 O3N 2.428(14) . ? 
Na5 O17N 2.465(14) . ? 
Na5 O29N 2.481(15) . ? 
Na5 O21N 2.509(14) . ? 
Na6 O26N 2.280(12) . ? 
Na6 O26N 2.321(13) 2_676 ? 
Na6 O10N 2.328(14) . ? 
Na6 O19N 2.336(13) . ? 
Na6 O12N 2.361(14) . ? 
Na6 Na7 3.239(10) . ? 
Na6 Na6 3.290(13) 2_676 ? 
Na7 O23N 2.320(14) . ? 
Na7 O10N 2.379(13) . ? 
Na7 O12N 2.421(14) . ? 
Na7 O2N 2.447(14) . ? 
Na7 O6N 2.482(14) . ? 
Na7 O8N 2.534(14) . ? 
Na7 Na9 3.510(10) 1_556 ? 
Na8 O14N 2.388(13) . ? 
Na8 O30N 2.420(14) . ? 
Na8 O32N 2.440(14) . ? 
Na8 O20N 2.456(15) . ? 
Na8 O13N 2.548(16) . ? 
Na9 O23N 2.364(14) 1_554 ? 
Na9 O11N 2.374(13) . ? 
Na9 O4N 2.413(14) . ? 
Na9 O22N 2.426(13) . ? 
Na9 O5N 2.488(14) . ? 
Na9 O6N 2.515(14) 1_554 ? 
Na9 Na7 3.510(10) 1_554 ? 
O27N Na2 2.429(13) 2_675 ? 
O26N Na6 2.321(13) 2_676 ? 
O25N Na3 2.436(14) 2_775 ? 
O23N Na9 2.364(14) 1_556 ? 
O6N Na9 2.515(14) 1_556 ? 
  
loop_ 
 _geom_angle_atom_site_label_1 
 _geom_angle_atom_site_label_2 
 _geom_angle_atom_site_label_3 
 _geom_angle 
 _geom_angle_site_symmetry_1 
 _geom_angle_site_symmetry_3 
 _geom_angle_publ_flag 
O4 W4 O4E 104.1(5) . . ? 
O4 W4 O34 102.9(5) . . ? 
O4E W4 O34 90.9(5) . . ? 
O4 W4 O45 99.6(5) . . ? 
O4E W4 O45 92.1(5) . . ? 
O34 W4 O45 155.8(4) . . ? 
O4 W4 O14 97.5(5) . . ? 
O4E W4 O14 158.3(5) . . ? 
O34 W4 O14 86.3(5) . . ? 
O45 W4 O14 82.0(5) . . ? 
O4 W4 O2C 171.1(4) . . ? 
O4E W4 O2C 84.7(4) . . ? 
O34 W4 O2C 78.4(4) . . ? 
O45 W4 O2C 78.1(4) . . ? 
O14 W4 O2C 73.7(4) . . ? 
O9 W9 O9E 103.3(5) . . ? 
O9 W9 O89 101.5(5) . . ? 
O9E W9 O89 91.7(5) . . ? 
O9 W9 O69 103.6(5) . . ? 
O9E W9 O69 91.5(5) . . ? 
O89 W9 O69 153.2(4) . . ? 
O9 W9 O910 98.0(5) . . ? 
O9E W9 O910 158.6(5) . . ? 
O89 W9 O910 84.4(4) . . ? 
O69 W9 O910 83.0(4) . . ? 
O9 W9 O1C 172.1(4) . . ? 
O9E W9 O1C 84.5(4) . . ? 
O89 W9 O1C 77.0(4) . . ? 
O69 W9 O1C 76.8(4) . . ? 
O910 W9 O1C 74.1(4) . . ? 
O3 W3 O3E 103.7(5) . . ? 
O3 W3 O23 105.3(5) . . ? 
O3E W3 O23 90.8(5) . . ? 
O3 W3 O34 101.1(5) . . ? 
O3E W3 O34 91.7(5) . . ? 
O23 W3 O34 152.1(5) . . ? 
O3 W3 O13 99.7(5) . . ? 
O3E W3 O13 156.6(5) . . ? 
O23 W3 O13 83.2(4) . . ? 
O34 W3 O13 83.5(4) . . ? 
O3 W3 O2C 172.7(5) . . ? 
O3E W3 O2C 83.5(5) . . ? 
O23 W3 O2C 75.1(4) . . ? 
O34 W3 O2C 77.5(4) . . ? 
O13 W3 O2C 73.1(4) . . ? 
O8 W8 O8E 103.2(5) . . ? 
O8 W8 O78 100.1(5) . . ? 
O8E W8 O78 92.4(5) . . ? 
O8 W8 O89 103.0(5) . . ? 
O8E W8 O89 91.1(5) . . ? 
O78 W8 O89 155.1(4) . . ? 
O8 W8 O810 97.7(5) . . ? 
O8E W8 O810 159.1(5) . . ? 
O78 W8 O810 83.8(4) . . ? 
O89 W8 O810 84.2(4) . . ? 
O8 W8 O1C 171.2(4) . . ? 
O8E W8 O1C 85.5(4) . . ? 
O78 W8 O1C 78.8(4) . . ? 
O89 W8 O1C 77.0(4) . . ? 
O810 W8 O1C 73.6(4) . . ? 
O5 W5 O5E 102.8(5) . . ? 
O5 W5 O35 101.5(5) . . ? 
O5E W5 O35 92.7(4) . . ? 
O5 W5 O45 101.8(5) . . ? 
O5E W5 O45 91.7(4) . . ? 
O35 W5 O45 154.7(5) . . ? 
O5 W5 O15 99.3(5) . . ? 
O5E W5 O15 157.9(5) . . ? 
O35 W5 O15 83.0(4) . . ? 
O45 W5 O15 83.7(4) . . ? 
O5 W5 O2C 173.2(4) . . ? 
O5E W5 O2C 83.9(4) . . ? 
O35 W5 O2C 77.0(4) . . ? 
O45 W5 O2C 78.7(4) . . ? 
O15 W5 O2C 74.0(4) . . ? 
O2 W2 O2E 105.2(5) . . ? 
O2 W2 O35 102.9(6) . . ? 
O2E W2 O35 92.8(5) . . ? 
O2 W2 O23 100.7(6) . . ? 
O2E W2 O23 91.9(5) . . ? 
O35 W2 O23 153.8(5) . . ? 
O2 W2 O12 96.0(5) . . ? 
O2E W2 O12 158.8(4) . . ? 
O35 W2 O12 83.4(4) . . ? 
O23 W2 O12 82.9(5) . . ? 
O2 W2 O2C 169.5(5) . . ? 
O2E W2 O2C 85.1(4) . . ? 
O35 W2 O2C 77.9(4) . . ? 
O23 W2 O2C 76.8(4) . . ? 
O12 W2 O2C 73.6(4) . . ? 
O7 W7 O7E 104.1(5) . . ? 
O7 W7 O67 102.5(5) . . ? 
O7E W7 O67 92.7(4) . . ? 
O7 W7 O78 101.6(5) . . ? 
O7E W7 O78 91.0(4) . . ? 
O67 W7 O78 154.0(5) . . ? 
O7 W7 O710 98.2(5) . . ? 
O7E W7 O710 157.7(5) . . ? 
O67 W7 O710 84.3(4) . . ? 
O78 W7 O710 82.6(4) . . ? 
O7 W7 O1C 170.9(4) . . ? 
O7E W7 O1C 85.0(4) . . ? 
O67 W7 O1C 77.8(4) . . ? 
O78 W7 O1C 76.9(4) . . ? 
O710 W7 O1C 72.7(4) . . ? 
O6 W6 O6E 104.8(5) . . ? 
O6 W6 O67 104.6(5) . . ? 
O6E W6 O67 92.5(5) . . ? 
O6 W6 O69 98.5(5) . . ? 
O6E W6 O69 91.1(5) . . ? 
O67 W6 O69 154.9(4) . . ? 
O6 W6 O610 97.6(4) . . ? 
O6E W6 O610 157.3(4) . . ? 
O67 W6 O610 85.1(4) . . ? 
O69 W6 O610 82.1(4) . . ? 
O6 W6 O1C 170.0(4) . . ? 
O6E W6 O1C 84.3(4) . . ? 
O67 W6 O1C 78.8(4) . . ? 
O69 W6 O1C 76.8(4) . . ? 
O610 W6 O1C 73.1(4) . . ? 
O10 W10 O610 103.6(5) . . ? 
O10 W10 O710 103.2(5) . . ? 
O610 W10 O710 89.1(5) . . ? 
O10 W10 O810 102.1(5) . . ? 
O610 W10 O810 154.3(4) . . ? 
O710 W10 O810 85.9(5) . . ? 
O10 W10 O910 102.3(5) . . ? 
O610 W10 O910 86.4(5) . . ? 
O710 W10 O910 154.4(4) . . ? 
O810 W10 O910 87.3(5) . . ? 
O10 W10 O1C 178.1(4) . . ? 
O610 W10 O1C 78.0(4) . . ? 
O710 W10 O1C 77.7(4) . . ? 
O810 W10 O1C 76.3(4) . . ? 
O910 W10 O1C 76.8(4) . . ? 
O1 W1 O12 104.2(5) . . ? 
O1 W1 O13 104.5(5) . . ? 
O12 W1 O13 88.7(5) . . ? 
O1 W1 O14 101.7(5) . . ? 
O12 W1 O14 153.8(5) . . ? 
O13 W1 O14 88.9(5) . . ? 
O1 W1 O15 100.8(5) . . ? 
O12 W1 O15 86.8(5) . . ? 
O13 W1 O15 154.6(4) . . ? 
O14 W1 O15 84.3(5) . . ? 
O1 W1 O2C 177.0(5) . . ? 
O12 W1 O2C 77.3(4) . . ? 
O13 W1 O2C 78.1(4) . . ? 
O14 W1 O2C 76.6(4) . . ? 
O15 W1 O2C 76.6(4) . . ? 
O3E Er11 O2E 75.6(4) . . ? 
O3E Er11 O5E 117.8(4) . . ? 
O2E Er11 O5E 74.1(4) . . ? 
O3E Er11 O8E 74.9(4) . . ? 
O2E Er11 O8E 141.4(4) . . ? 
O5E Er11 O8E 142.9(4) . . ? 
O3E Er11 O4E 74.8(4) . . ? 
O2E Er11 O4E 118.6(4) . . ? 
O5E Er11 O4E 74.4(4) . . ? 
O8E Er11 O4E 76.4(4) . . ? 
O3E Er11 O9E 140.1(4) . . ? 
O2E Er11 O9E 142.2(4) . . ? 
O5E Er11 O9E 76.0(4) . . ? 
O8E Er11 O9E 74.2(4) . . ? 
O4E Er11 O9E 73.8(4) . . ? 
O3E Er11 O6E 145.0(4) . . ? 
O2E Er11 O6E 77.6(4) . . ? 
O5E Er11 O6E 75.0(4) . . ? 
O8E Er11 O6E 115.7(4) . . ? 
O4E Er11 O6E 138.9(4) . . ? 
O9E Er11 O6E 72.7(4) . . ? 
O3E Er11 O7E 78.0(4) . . ? 
O2E Er11 O7E 75.9(4) . . ? 
O5E Er11 O7E 140.4(3) . . ? 
O8E Er11 O7E 74.1(4) . . ? 
O4E Er11 O7E 144.0(4) . . ? 
O9E Er11 O7E 116.3(4) . . ? 
O6E Er11 O7E 73.9(4) . . ? 
W6 O69 W9 114.8(6) . . ? 
W2 O35 W5 114.0(5) . . ? 
W6 O67 W7 114.0(5) . . ? 
W9 O89 W8 114.3(5) . . ? 
W9 O9E Er11 131.8(5) . . ? 
W3 O3E Er11 131.8(6) . . ? 
W5 O5E Er11 130.5(6) . . ? 
W10 O610 W6 115.4(5) . . ? 
W6 O6E Er11 132.3(5) . . ? 
W8 O78 W7 113.6(6) . . ? 
W2 O23 W3 116.5(6) . . ? 
W1 O15 W5 114.7(5) . . ? 
W8 O8E Er11 130.4(5) . . ? 
W2 O2E Er11 129.3(5) . . ? 
W4 O4E Er11 129.6(6) . . ? 
W10 O910 W9 114.3(5) . . ? 
W5 O45 W4 112.3(5) . . ? 
W10 O1C W8 94.8(3) . . ? 
W10 O1C W9 94.7(4) . . ? 
W8 O1C W9 90.7(3) . . ? 
W10 O1C W6 93.4(4) . . ? 
W8 O1C W6 171.6(5) . . ? 
W9 O1C W6 90.3(3) . . ? 
W10 O1C W7 93.7(3) . . ? 
W8 O1C W7 89.6(3) . . ? 
W9 O1C W7 171.5(5) . . ? 
W6 O1C W7 88.2(3) . . ? 
W1 O14 W4 116.1(5) . . ? 
W10 O810 W8 115.3(5) . . ? 
W7 O7E Er11 130.8(6) . . ? 
W2 O2 Na3 132.4(6) . . ? 
W1 O13 W3 116.0(5) . . ? 
W3 O34 W4 114.3(5) . . ? 
W10 O710 W7 115.9(5) . . ? 
W1 O12 W2 115.2(5) . . ? 
W6 O6 Na8 143.6(6) . . ? 
O1N Na1 O15N 163.7(5) . . ? 
O1N Na1 O13N 82.5(5) . . ? 
O15N Na1 O13N 87.0(5) . . ? 
O1N Na1 O28N 85.9(5) . . ? 
O15N Na1 O28N 105.6(5) . . ? 
O13N Na1 O28N 167.1(5) . . ? 
O1N Na1 O3N 79.4(5) . . ? 
O15N Na1 O3N 90.8(5) . . ? 
O13N Na1 O3N 101.9(5) . . ? 
O28N Na1 O3N 81.3(4) . . ? 
O1N Na1 O14N 102.7(5) . . ? 
O15N Na1 O14N 87.4(5) . . ? 
O13N Na1 O14N 79.2(5) . . ? 
O28N Na1 O14N 98.1(4) . . ? 
O3N Na1 O14N 177.8(5) . . ? 
O1N Na1 Na8 73.5(4) . . ? 
O15N Na1 Na8 107.5(4) . . ? 
O13N Na1 Na8 45.9(4) . . ? 
O28N Na1 Na8 124.9(4) . . ? 
O3N Na1 Na8 139.7(4) . . ? 
O14N Na1 Na8 42.3(3) . . ? 
O1N Na1 Na5 84.3(4) . . ? 
O15N Na1 Na5 96.8(4) . . ? 
O13N Na1 Na5 142.6(4) . . ? 
O28N Na1 Na5 40.5(3) . . ? 
O3N Na1 Na5 41.1(3) . . ? 
O14N Na1 Na5 138.0(4) . . ? 
Na8 Na1 Na5 155.3(3) . . ? 
O11N Na2 O27N 174.7(5) . . ? 
O11N Na2 O25N 100.3(4) . . ? 
O27N Na2 O25N 85.0(4) . . ? 
O11N Na2 O27N 91.1(4) . 2_675 ? 
O27N Na2 O27N 83.6(5) . 2_675 ? 
O25N Na2 O27N 168.4(5) . 2_675 ? 
O11N Na2 O3 85.8(4) . . ? 
O27N Na2 O3 95.0(5) . . ? 
O25N Na2 O3 83.5(4) . . ? 
O27N Na2 O3 99.4(5) 2_675 . ? 
O11N Na2 O22N 84.7(4) . . ? 
O27N Na2 O22N 94.7(4) . . ? 
O25N Na2 O22N 94.2(4) . . ? 
O27N Na2 O22N 84.8(4) 2_675 . ? 
O3 Na2 O22N 169.7(5) . . ? 
O11N Na2 Na9 42.3(3) . . ? 
O27N Na2 Na9 138.0(4) . . ? 
O25N Na2 Na9 92.2(4) . . ? 
O27N Na2 Na9 95.0(4) 2_675 . ? 
O3 Na2 Na9 126.3(4) . . ? 
O22N Na2 Na9 43.6(3) . . ? 
O11N Na2 Na2 132.6(4) . 2_675 ? 
O27N Na2 Na2 42.1(3) . 2_675 ? 
O25N Na2 Na2 127.1(4) . 2_675 ? 
O27N Na2 Na2 41.5(3) 2_675 2_675 ? 
O3 Na2 Na2 99.7(4) . 2_675 ? 
O22N Na2 Na2 89.7(4) . 2_675 ? 
Na9 Na2 Na2 123.7(3) . 2_675 ? 
O18N Na3 O17N 163.3(5) . . ? 
O18N Na3 O7N 89.0(5) . . ? 
O17N Na3 O7N 97.5(5) . . ? 
O18N Na3 O25N 92.9(4) . 2_775 ? 
O17N Na3 O25N 102.0(5) . 2_775 ? 
O7N Na3 O25N 93.8(5) . 2_775 ? 
O18N Na3 O21N 84.8(4) . . ? 
O17N Na3 O21N 78.5(4) . . ? 
O7N Na3 O21N 112.7(5) . . ? 
O25N Na3 O21N 153.3(5) 2_775 . ? 
O18N Na3 O2 76.3(5) . . ? 
O17N Na3 O2 98.3(5) . . ? 
O7N Na3 O2 164.2(5) . . ? 
O25N Na3 O2 81.3(4) 2_775 . ? 
O21N Na3 O2 72.4(4) . . ? 
O18N Na3 Na5 123.5(4) . . ? 
O17N Na3 Na5 40.6(3) . . ? 
O7N Na3 Na5 122.7(4) . . ? 
O25N Na3 Na5 125.3(4) 2_775 . ? 
O21N Na3 Na5 41.8(3) . . ? 
O2 Na3 Na5 71.5(3) . . ? 
O2N Na4 O8N 84.3(5) . . ? 
O2N Na4 O31N 89.8(5) . . ? 
O8N Na4 O31N 167.1(5) . . ? 
O2N Na4 O24N 171.4(5) . . ? 
O8N Na4 O24N 104.2(5) . . ? 
O31N Na4 O24N 81.6(5) . . ? 
O2N Na4 O9N 99.7(5) . . ? 
O8N Na4 O9N 86.1(4) . . ? 
O31N Na4 O9N 106.3(5) . . ? 
O24N Na4 O9N 82.4(4) . . ? 
O2N Na4 O5 92.7(5) . . ? 
O8N Na4 O5 92.5(4) . . ? 
O31N Na4 O5 76.3(4) . . ? 
O24N Na4 O5 85.7(4) . . ? 
O9N Na4 O5 167.3(5) . . ? 
O2N Na4 Na7 42.1(3) . . ? 
O8N Na4 Na7 44.2(3) . . ? 
O31N Na4 Na7 126.6(4) . . ? 
O24N Na4 Na7 145.6(4) . . ? 
O9N Na4 Na7 104.0(4) . . ? 
O5 Na4 Na7 83.4(3) . . ? 
O16N Na5 O28N 171.1(5) . . ? 
O16N Na5 O3N 89.8(5) . . ? 
O28N Na5 O3N 82.0(5) . . ? 
O16N Na5 O17N 101.4(5) . . ? 
O28N Na5 O17N 86.6(5) . . ? 
O3N Na5 O17N 168.2(5) . . ? 
O16N Na5 O29N 84.4(5) . . ? 
O28N Na5 O29N 99.6(5) . . ? 
O3N Na5 O29N 94.6(5) . . ? 
O17N Na5 O29N 90.3(5) . . ? 
O16N Na5 O21N 79.9(5) . . ? 
O28N Na5 O21N 98.5(5) . . ? 
O3N Na5 O21N 102.2(5) . . ? 
O17N Na5 O21N 76.4(5) . . ? 
O29N Na5 O21N 156.8(6) . . ? 
O16N Na5 Na1 130.4(4) . . ? 
O28N Na5 Na1 41.0(3) . . ? 
O3N Na5 Na1 41.3(3) . . ? 
O17N Na5 Na1 127.0(4) . . ? 
O29N Na5 Na1 103.5(4) . . ? 
O21N Na5 Na1 99.7(4) . . ? 
O16N Na5 Na3 103.6(4) . . ? 
O28N Na5 Na3 80.0(3) . . ? 
O3N Na5 Na3 134.1(4) . . ? 
O17N Na5 Na3 39.6(3) . . ? 
O29N Na5 Na3 129.9(4) . . ? 
O21N Na5 Na3 40.6(3) . . ? 
Na1 Na5 Na3 107.2(2) . . ? 
O26N Na6 O26N 88.7(5) . 2_676 ? 
O26N Na6 O10N 94.8(5) . . ? 
O26N Na6 O10N 172.0(5) 2_676 . ? 
O26N Na6 O19N 168.0(5) . . ? 
O26N Na6 O19N 87.5(4) 2_676 . ? 
O10N Na6 O19N 87.6(5) . . ? 
O26N Na6 O12N 95.9(5) . . ? 
O26N Na6 O12N 91.7(5) 2_676 . ? 
O10N Na6 O12N 95.0(5) . . ? 
O19N Na6 O12N 95.5(5) . . ? 
O26N Na6 Na7 102.6(4) . . ? 
O26N Na6 Na7 138.8(4) 2_676 . ? 
O10N Na6 Na7 47.2(3) . . ? 
O19N Na6 Na7 87.6(4) . . ? 
O12N Na6 Na7 48.1(3) . . ? 
O26N Na6 Na6 44.8(3) . 2_676 ? 
O26N Na6 Na6 43.9(3) 2_676 2_676 ? 
O10N Na6 Na6 139.2(5) . 2_676 ? 
O19N Na6 Na6 130.3(5) . 2_676 ? 
O12N Na6 Na6 95.3(4) . 2_676 ? 
Na7 Na6 Na6 133.0(3) . 2_676 ? 
O23N Na7 O10N 102.9(5) . . ? 
O23N Na7 O12N 162.3(5) . . ? 
O10N Na7 O12N 92.1(5) . . ? 
O23N Na7 O2N 87.3(5) . . ? 
O10N Na7 O2N 159.7(5) . . ? 
O12N Na7 O2N 81.5(5) . . ? 
O23N Na7 O6N 87.5(5) . . ? 
O10N Na7 O6N 80.9(5) . . ? 
O12N Na7 O6N 85.6(5) . . ? 
O2N Na7 O6N 117.5(5) . . ? 
O23N Na7 O8N 101.0(5) . . ? 
O10N Na7 O8N 81.6(5) . . ? 
O12N Na7 O8N 90.4(5) . . ? 
O2N Na7 O8N 79.1(4) . . ? 
O6N Na7 O8N 161.9(5) . . ? 
O23N Na7 Na6 148.6(4) . . ? 
O10N Na7 Na6 45.9(3) . . ? 
O12N Na7 Na6 46.6(3) . . ? 
O2N Na7 Na6 123.1(4) . . ? 
O6N Na7 Na6 84.7(4) . . ? 
O8N Na7 Na6 79.8(3) . . ? 
O23N Na7 Na9 41.9(3) . 1_556 ? 
O10N Na7 Na9 90.4(4) . 1_556 ? 
O12N Na7 Na9 130.1(4) . 1_556 ? 
O2N Na7 Na9 108.5(4) . 1_556 ? 
O6N Na7 Na9 45.8(3) . 1_556 ? 
O8N Na7 Na9 139.1(4) . 1_556 ? 
Na6 Na7 Na9 121.6(3) . 1_556 ? 
O23N Na7 Na4 104.3(4) . . ? 
O10N Na7 Na4 119.4(4) . . ? 
O12N Na7 Na4 75.6(4) . . ? 
O2N Na7 Na4 40.3(3) . . ? 
O6N Na7 Na4 152.3(4) . . ? 
O8N Na7 Na4 40.6(3) . . ? 
Na6 Na7 Na4 96.4(2) . . ? 
Na9 Na7 Na4 142.0(2) 1_556 . ? 
O14N Na8 O30N 90.7(5) . . ? 
O14N Na8 O32N 157.3(5) . . ? 
O30N Na8 O32N 96.1(5) . . ? 
O14N Na8 O20N 109.8(5) . . ? 
O30N Na8 O20N 82.6(5) . . ? 
O32N Na8 O20N 92.6(5) . . ? 
O14N Na8 O6 82.0(4) . . ? 
O30N Na8 O6 164.9(5) . . ? 
O32N Na8 O6 95.7(4) . . ? 
O20N Na8 O6 87.4(4) . . ? 
O14N Na8 O13N 77.6(4) . . ? 
O30N Na8 O13N 120.5(5) . . ? 
O32N Na8 O13N 80.3(4) . . ? 
O20N Na8 O13N 156.3(5) . . ? 
O6 Na8 O13N 70.9(4) . . ? 
O14N Na8 Na1 43.9(3) . . ? 
O30N Na8 Na1 90.9(4) . . ? 
O32N Na8 Na1 114.1(4) . . ? 
O20N Na8 Na1 153.0(4) . . ? 
O6 Na8 Na1 92.9(4) . . ? 
O13N Na8 Na1 42.4(3) . . ? 
O23N Na9 O11N 105.3(5) 1_554 . ? 
O23N Na9 O4N 88.6(5) 1_554 . ? 
O11N Na9 O4N 86.0(4) . . ? 
O23N Na9 O22N 168.6(5) 1_554 . ? 
O11N Na9 O22N 85.9(5) . . ? 
O4N Na9 O22N 90.4(4) . . ? 
O23N Na9 O5N 82.7(5) 1_554 . ? 
O11N Na9 O5N 93.2(5) . . ? 
O4N Na9 O5N 170.7(5) . . ? 
O22N Na9 O5N 98.7(4) . . ? 
O23N Na9 O6N 85.8(5) 1_554 1_554 ? 
O11N Na9 O6N 165.3(5) . 1_554 ? 
O4N Na9 O6N 104.0(5) . 1_554 ? 
O22N Na9 O6N 83.4(4) . 1_554 ? 
O5N Na9 O6N 78.6(4) . 1_554 ? 
O23N Na9 Na7 41.0(3) 1_554 1_554 ? 
O11N Na9 Na7 146.0(4) . 1_554 ? 
O4N Na9 Na7 95.4(4) . 1_554 ? 
O22N Na9 Na7 127.9(4) . 1_554 ? 
O5N Na9 Na7 80.1(4) . 1_554 ? 
O6N Na9 Na7 45.0(3) 1_554 1_554 ? 
O23N Na9 Na2 146.7(4) 1_554 . ? 
O11N Na9 Na2 42.3(3) . . ? 
O4N Na9 Na2 95.4(4) . . ? 
O22N Na9 Na2 44.8(3) . . ? 
O5N Na9 Na2 90.2(4) . . ? 
O6N Na9 Na2 124.7(4) 1_554 . ? 
Na7 Na9 Na2 167.0(3) 1_554 . ? 
W3 O3 Na2 155.8(7) . . ? 
W5 O5 Na4 134.5(6) . . ? 
W1 O2C W2 93.9(4) . . ? 
W1 O2C W5 94.7(4) . . ? 
W2 O2C W5 89.7(3) . . ? 
W1 O2C W4 93.4(4) . . ? 
W2 O2C W4 172.7(5) . . ? 
W5 O2C W4 90.0(4) . . ? 
W1 O2C W3 92.9(4) . . ? 
W2 O2C W3 90.5(4) . . ? 
W5 O2C W3 172.4(5) . . ? 
W4 O2C W3 88.9(3) . . ? 
Na5 O28N Na1 98.5(5) . . ? 
Na2 O27N Na2 96.4(5) . 2_675 ? 
Na6 O26N Na6 91.3(5) . 2_676 ? 
Na2 O25N Na3 131.9(6) . 2_775 ? 
Na7 O23N Na9 97.1(5) . 1_556 ? 
Na9 O22N Na2 91.6(4) . . ? 
Na3 O21N Na5 97.6(5) . . ? 
Na3 O17N Na5 99.7(5) . . ? 
Na8 O14N Na1 93.9(4) . . ? 
Na1 O13N Na8 91.6(5) . . ? 
Na6 O12N Na7 85.3(4) . . ? 
Na9 O11N Na2 95.4(5) . . ? 
Na6 O10N Na7 87.0(4) . . ? 
Na4 O8N Na7 95.2(5) . . ? 
Na7 O6N Na9 89.2(4) . 1_556 ? 
Na5 O3N Na1 97.6(5) . . ? 
Na4 O2N Na7 97.6(5) . . ? 
  
_diffrn_measured_fraction_theta_max    0.983 
_diffrn_reflns_theta_full              30.09 
_diffrn_measured_fraction_theta_full   0.983 
_refine_diff_density_max    8.880 
_refine_diff_density_min   -6.543 
_refine_diff_density_rms    0.800 
  
  
